# Supplementary material for: The E6 Oncoprotein of HPV16 AA-c Variant Regulates Cell Migration through the MINCR/miR-28-5p/RAP1B Axis
Source: MDPI journal article supplement (doi:10.3390/v14050963), 2022-05-05
Supplement: s1 [file s1]

**Supplementary Table S1. MINCR target miRNAs**

| <b>miRNAname</b> | <b>miRNAid</b> | <b>merClass</b> | <b>PancancerNum</b> |
|------------------|----------------|-----------------|---------------------|
| hsa-miR-374a-3p  | MIMAT0004688   | 7mer-m8         | 4                   |
| hsa-miR-513a-5p  | MIMAT0002877   | 7mer-m8         | 2                   |
| hsa-miR-223-3p   | MIMAT0000280   | 7mer-m8         | 16                  |
| hsa-miR-421      | MIMAT0003339   | 8mer            | 2                   |
| hsa-miR-3167     | MIMAT0015042   | 7mer-m8         | 1                   |
| hsa-miR-876-5p   | MIMAT0004924   | 7mer-m8         | 2                   |
| hsa-miR-28-5p    | MIMAT0000085   | 7mer-m8         | 4                   |
| hsa-miR-708-5p   | MIMAT0004926   | 7mer-m8         | 4                   |
| hsa-miR-3139     | MIMAT0015007   | 7mer-m8         | 1                   |
| hsa-miR-146a-5p  | MIMAT0000449   | 7mer-m8         | 10                  |
| hsa-miR-146b-5p  | MIMAT0002809   | 7mer-m8         | 8                   |
| hsa-miR-7153-5p  | MIMAT0028216   | 7mer-m8         | 0                   |

**Supplementary Table S2. miR-28-5p targets**

| <b>Gene symbol</b> | <b>Reference Sequence id</b> | <b>Number of pairings</b> | <b>Position</b> |
|--------------------|------------------------------|---------------------------|-----------------|
| TEX261             | NM_144582                    | 19                        | 3UTR            |
| N4BP1              | NM_153029                    | 19                        | 3UTR            |
| RAP1B              | NM_015646                    | 8                         | 3UTR            |
